# Supplementary material
Source: Research Square preprint supplement (doi:10.21203/rs.3.rs-8955153/v1)
Supplement: Supplementary file 1 [file d9d8ff08a5132e07eea217da.xlsx]

## Sheet: Sheet1
Year	Mobile_Money_Penetration_pct	Bank_Account_Penetration_pct	Domestic_Credit_Private_Sector_pct_GDP	Banking_Assets_pct_GDP	NPL_Ratio_pct	Banking_Stability_Proxy	Leadership_Index_WGI
2019	70	15	0	4	3	33.33	-2.2
2020	72	15.5	0	4.1	3.2	31.25	-2
2021	73	15.5	0	4.2	3	33.33	-1.95
2022	74	15.5	0	4.3	2.8	35.71	-1.88
2023	75	15.5	0	4.3	2.6	38.46	-1.78
2024	75	15.5	0	4.3	2.6	38.46	-1.84

## Sheet: Sheet2
Variable	Obs	Mean	Std. Dev.	Min	Max		Variable	Coefficient	Robust Std. Error	t-stat	p-value
Banking System Stability	6	35.09	2.97	31.25	38.46		Mobile Money Penetration (DFI)	15.185	0.838	18.11	0.003
Mobile Money Penetration (%)	6	73.17	1.94	70	75		Leadership Index	−476.382	26.631	−17.89	0.003
Bank Account Penetration (%)	6	15.42	0.2	15	15.5		DFI × Leadership	6.308	0.356	17.73	0.003
Domestic Credit to Private Sector (% GDP)	6	0	0	0	0		Constant	−1106.233	66.795	−16.56	0.004
Banking Assets (% GDP)	6	4.2	0.13	4	4.3		Observations	6
Leadership Index (WGI)	6	−1.94	0.15	−2.20	−1.78		R²	0.996
							F-statistic	1598.96
Test	Result	Interpretation
Durbin–Watson	1.82	No strong serial correlation
VIF (interaction model)	High	Expected due to interaction term and small sample
